# Supplementary material for: Bacillus amyloliquefaciens-secreted cyclic dipeptide – cyclo(l-leucyl-l-prolyl) inhibits biofilm and virulence production in methicillin-resistant Staphylococcus aureus
Source: Royal Society of Chemistry journal article supplement (doi:10.1039/c5ra11641d), 2015-01-01
Supplement: c5ra11641d1.pdf [file c5ra11641d1.pdf]

### Supplementary table: 1

| Primer Sequence (5'-3') |                                 |                             |            |
|-------------------------|---------------------------------|-----------------------------|------------|
| Gene                    | Forward                         | Reverse                     | Reference  |
| 16S rRNA                | ACTCCTACGGGAGGCAGCAG            | ATTACCGCGGCTGCTGG           | This study |
| <i>icaA</i>             | ACACTTGCTGGCGCAGTCAA            | TCTGGAACCAACATCCAACA        | 51         |
| <i>icaD</i>             | ATGGTCAAGCCCAGACAGAG            | AGTATTTTCAATGTTTAAAGCA      | 51         |
| <i>sspB</i>             | CCAGCAAATTGTTGTTGTGCTAG         | AAGCCAAAGCCGATTCACACTC      | 21         |
| <i>fnbA</i>             | ATCAGCAGATGTAGCGGAAG            | TTTAGTACCGCTCGTTGTCC        | 52         |
| <i>fnbB</i>             | AAGAAGCACCGAAAAGTGTG            | TCTCTGCAACTGCTGTAACG        | 52         |
| <i>clfA</i>             | ATTGGCGTGGCTTCAGTGCT            | CGTTTCTTCCGTAGTTGCATTTG     | 53         |
| <i>altA</i>             | TGTCGAAGTATTTGCCGACTTCGC        | TGGAATCCTGCACATCCAGGAAC     | 21         |
| <i>sarA</i>             | CCCAGAAATACAATCACTGTG           | AGTGCCATTAGTGCAAAACC        | 54         |
| <i>hla</i>              | CAACTGATAAAAAAGTAGGCTGGAAAGTGAT | CTGGTGAAAACCCTGAAGATAATAGAG | 51         |

51: B. Kouidhi, T. Zmantar, H. Hentati and A. Bakhrouf, *Microb. Pathog.*, 2010, **49**, 14.

52: N. M. Abraham and K. K. Jefferson, *Microb. Pathog.*, 2010, **49**, 388.

53: A. Tristan, L. Ying, M. Bes, J. Etienne, F. Vandenesch and G. Lina, *J. Clin. Microbiol.*, 2003, **41**, 4465.

54: J. H. Kim, C. H. Kim, J. Hacker, W. Ziebuhr, B. K. Lee and S. H. Cho, *J. Microbiol. Biotechnol.*, 2008, **18**, 28.
